# Supplementary material for: Antibacterial Activity of Essential Oils Extracted From the Unique Chinese Spices Cassia Bark, Bay Fruits, and Cloves
Source: Research Square preprint supplement (doi:10.21203/rs.3.rs-1245027/v1), 2022-02-21
Supplement: Supplementary file 1 [file 2f67175e653c49aab4742f05.docx]

**TABLE 2.**The zones of inhibition (mm) of the volatile oil extracted under different extraction conditions.

|  |  | *L. monocytogens* ATCC19117 (LM) | | | *L. innocua* ATCC33090(LI) | | | *L. welshimeri* ATCC43548 (LW) | | | *L. ivanovii*ATCC BAA-678 (LL) | | | *L. grayi*ATCC25400(LG) | | | *V. parahaemolyticus*ATCC33847 (VP) | | |
| --- | --- | --- | --- | --- | --- | --- | --- | --- | --- | --- | --- | --- | --- | --- | --- | --- | --- | --- | --- |
|  |  | cassia bark | Bay | cloves | cassia bark | bay | cloves | cassia bark | bay | cloves | cassia bark | bay | cloves | cassia bark | bay | cloves | cassia bark | bay | cloves |
| Spice  to  solvent  ratio | 1:5 | 7.0 ± 0.01 | 7.2 ± 0.01 | 1.6 ± 0.29 | 7.2 ± 0.03 | 7.2 ± 0.01 | 1.6 ± 0.08 | 6.9±0.02 | 7.6 ± 0.06 | 1.6 ± 0.16 | 7.3±0.07 | 6.8 ± 0.01 | 1.7 ± 0.08 | 7.2 ±0.07 | 7.2 ± 0.06 | 1.6 ± 0.08 | 15.9 ± 0.35 | 12.4 ± 0.85 | 1.5 ± 0.12 |
| 1:10 | 8.4 ± 0.24 | 7.2 ± 0.01 | 1.8 ± 0.31 | 7.4 ± 0.01 | 7.3 ± 0.03 | 1.7 ± 0.22 | 7.4 ±0.06 | 7.4 ± 0.06 | 1.7 ± 0.09 | 7.2±0.06 | 7.1 ± 0.03 | 1.8 ± 0.13 | 7.4 ±0.06 | 7.3 ± 0.06 | 1.7 ± 0.22 | **19.2* ± 0.17** | 15.1 ± 0.68 | 1.5 ± 0.06 |
| 1:15 | 7.2 ± 0.03 | 7.2 ± 0.01 | 1.6 ± 0.25 | 7.5 ± 0.02 | 7.3 ± 0.05 | 1.8 ± 0.09 | 7.2±0.05 | 7.7 ± 0.13 | 1.9 ± 0.20 | 7.0±0.02 | 7.2 ± 0.01 | 1.8 ± 0.11 | 7.0±0.02 | 7.3 ± 0.13 | 1.7 ± 0.09 | 17.4 ± 0.41 | 9.8 ± 0.32 | 1.6 ± 0.15 |
| 1:20 | 7.2 ± 0.03 | 7.1 ± 0.02 | 1.6 ± 0.08 | 7.6 ± 0.06 | 7.6 ± 0.07 | 1.9 ± 0.31 | 7.5 ±0.02 | 7.1±0.02 | 1.8 ± 0.26 | 7.4±0.04 | 7.7 ± 0.12 | 2.0 ± 0.32 | 8.9±0.23 | 7.9 ± 0.02 | 1.8 ± 0.31 | 14.0 ± 0.07 | 9.5 ± 0.26 | 1.4 ± 0.12 |
| 1:25 | 7.0 ± 0.02 | 7.1 ± 0.03 | 1.8 ± 0.36 | 7.6 ± 0.04 | 7.7 ± 0.05 | 1.8 ± 0.13 | 7.4 ±0.04 | 7.3 ± 0.04 | 1.8 ± 0.18 | 8.9±0.28 | 7.2 ± 0.01 | 1.9 ± 0.06 | 7.4±0.09 | 8.1 ± 0.04 | 1.9 ± 0.13 | 14.5 ± 0.06 | 12.1 ± 0.32 | **1.7* ± 0.03** |
| Ethanol  Concentration  (%) | 10% | 6.9 ± 0.02 | 7.1 ± 0.01 | 1.6 ± 0.20 | 6.8 ± 0.01 | 7.1 ± 0.01 | 1.2 ± 0.11 | 7.0±0.02 | 6.9 ± 0.02 | 1.6 ± 0.35 | 7.2±0.00 | 7.0 ± 0.02 | 1.8 ± 0.27 | 7.2±0.09 | 6.8 ± 0.02 | 1.2 ± 0.13 | 9.7 ± 0.21 | 13.2 ± 0.18 | 1.2 ± 0.13 |
| 30% | 6.8 ± 0.00 | 7.1 ± 0.02 | 1.7 ± 0.32 | 6.8 ± 0.01 | 7.0 ± 0.02 | 1.3 ± 0.08 | 7.0±0.03 | 7.0 ± 0.02 | 1.7 ± 0.11 | 7.4±0.03 | 7.1 ± 0.02 | 1.8 ± 0.21 | 7.8 ±0.03 | 7.0 ± 0.12 | 1.3 ± 0.18 | 10. 1± 0.11 | 14.5 ± 0.30 | 1.2 ± 0.05 |
| 50% | 8.8***** ± 0.29 | 7.2 ± 0.01 | 1.9 ± 0.13 | 6.9 ± 0.02 | 7.1 ± 0.01 | 1.4 ± 0.25 | 7.5±0.08 | 7.0 ± 0.02 | 1.8 ± 0.15 | 8.9±0.37 | 7.2 ± 0.00 | 1.9 ± 0.20 | 8.1 ±0.27 | 7.0 ± 0.32 | 1.4 ± 0.26 | 15.0 ± 0.04 | 13.1 ± 0.18 | 1.4 ± 0.07 |
| 70% | 7.9 ± 0.12 | 7.3 ± 0.01 | 1.9 ± 0.15 | 7.1 ± 0.01 | 7.1 ± 0.02 | 1.4 ± 0.11 | 74±0.09 | 7.1 ± 0.03 | 1.7 ± 0.17 | 7.4±0.03 | 7.2 ± 0.01 | 2.1 ± 0.17 | 7.5 ±0.04 | 7.1 ± 0.33 | 1.4 ± 0.21 | 13.3 ± 0.20 | 15.9 ± 0.15 | 1.6 ± 0.31 |
| 95% | 8.2 ± 0.18 | 7.5 ± 0.06 | 1.8 ± 0.25 | 6.9 ± 0.02 | 7.2 ± 0.02 | 1.3 ± 0.28 | 8.1±0.11 | 7.2 ± 0.00 | 1.9 ± 0.16 | 7.7±0.05 | 7.1 ± 0.02 | 2.0 ± 0.07 | 7.7±0.06 | 7.2 ± 0.00 | 1.3 ± 0.28 | **21.0* ± 0.96** | 16.8 ± 0.15 | 1.7 ± 0.45 |
| Extraction  temperature  (℃) | 40℃ | 7.4 ± 0.02 | 7.1 ± 0.02 | 1.8 ± 0.38 | 7.6 ± 0.06 | 7.0 ± 0.02 | 1.7 ± 0.15 | 10.0 ±0.25 | 7.4 ± 0.08 | 2.3 ± 0.17 | 8.6±0.05 | 7.5 ± 0.05 | 1.9 ± 0.37 | 8.6±0.05 | 7.3 ± 0.08 | 1.7 ± 0.15 | 9.1 ± 0.03 | 9.1 ± 0.22 | 1.7 ± 0.25 |
| 50℃ | 7.7 ± 0.04 | 7.2±0.02 | 1.9 ± 0.18 | 7.6 ± 0.03 | 6.9 ± 0.02 | 1.6 ± 0.07 | 9.7±0.30 | 7.3 ± 0.08 | 2.3 ± 0.15 | 9.2±0.17 | 7.5 ± 0.04 | 2.2 ± 0.27 | 9.0 ±0.17 | 7.2 ± 0.08 | 1.6 ± 0.07 | 11.2 ± 0.06 | 10.4 ± 0.42 | 1.6 ± 0.25 |
| 60℃ | 7.6±0.05 | 7.1±0.02 | 1.9 ± 0.09 | 7.2 ± 0.01 | 7.2 ± 0.01 | 1.6 ± 0.05 | 9.1±0.18 | 7.4 ± 0.04 | 2.1 ± 0.33 | 9.0±0.27 | 7.3 ± 0.00 | 1.8 ± 0.13 | 8.3 ±0.27 | 7.3 ± 0.04 | 1.6 ± 0.05 | **15.9* ± 0.07** | 9.6 ± 0.32 | 1.7 ± 0.08 |
| 70℃ | 7.5±0.03 | 7.1±0.02 | 1.9 ± 0.08 | 7.7 ± 0.05 | **7.4 *± 0.04** | 1.6 ± 0.14 | 9.2 ±0.23 | 6.8 ± 0.00 | 2.2 ± 0.10 | 8.1 ±0.15 | 7.2 ± 0.00 | 2.1 ± 0.23 | 8.4 ±0.15 | 6.7 ± 0.00 | 1.6 ± 0.14 | 15. 2± 0.05 | 9.9 ± 0.24 | 1.7 ± 0.08 |
| 80℃ | 7.4±0.07 | 7.1±0.02 | 1.9 ± 0.26 | 8.6 ± 0.14 | 7.2 ± 0.02 | 1.7 ± 0.26 | 8.1±0.09 | 7.4 ± 0.04 | 2.1 ± 0.11 | 8.5±0.13 | 7.1 ± 0.02 | 2.2 ± 0.26 | 8.6 ±0.13 | 7.2 ± 0.04 | 1.7 ± 0.26 | 9.1 ± 0.05 | 10.2 ± 0.27 | 1.6 ± 0.08 |
| Extraction  time | 0h | 7.5±0.08 | 7.0±0.07 | 1.5 ± 0.31 | 7.6 ± 0.03 | 7.1 ± 0.02 | 1.8 ± 0.10 | 6.8±0.00 | 7.0 ± 0.02 | 2.0±0.16 | 7.2±0.01 | 7.2 ± 0.00 | 2.0 ± 0.38 | 7.5 ±0.01 | 7.1 ± 0.02 | 1.8 ± 0.14 | 16.8 ± 0.35 | 8.6 ± 0.14 | 1.6 ± 0.08 |
| 2h | 7.8 ±0.06 | 7.3±0.06 | 1.7 ± 0.22 | 7.8 ± 0.12 | 7.2 ± 0.01 | 2.0 ± 0.36 | 7.3±0.08 | 7.3 ± 0.06 | 2.1±0.20 | 9.1±0.28 | 7.2±0.02 | 2.1 ± 0.52 | 9.2 ±0.28 | 7.4 ± 0.06 | 2.0 ± 0.12 | 18.6 ± 0.48 | 9.7 ± 0.28 | **1.9* ± 0.06** |
| 4h | 7.6 ±0.06 | 7.5±0.08 | 1.6 ± 0.28 | 7.5 ± 0.03 | 7.2 ± 0.02 | 1.6 ± 0.29 | 6.9±0.02 | 7.4 ± 0.06 | 2.2 ± 0.34 | 7.4±0.02 | 7.5 ± 0.05 | 1.9 ± 0.47 | 8.4±0.02 | 7.4 ± 0.09 | 1.6 ± 0.25 | 15.3 ± 0.39 | 10.4 ± 0.23 | 1.7 ± 0.20 |
| 6h | 7.9±0.11 | 7.3±0.03 | 1.5± 0.26 | 8.5 ± 0.11 | 7. 3± 0.02 | 1.8 ± 0.17 | 8.5±0.24 | 7.3 ± 0.01 | 2.2 ± 0.34 | 7.4±0.01 | 7.7 ± 0.07 | 2.0 ± 0.42 | 8.4±0.01 | 7.3 ± 0.08 | 1.7 ± 0.17 | 16.3 ± 0.01 | 9.6 ± 0.16 | 1.7 ± 0.09 |
| 8h | 7.7±0.08 | 7.4±0.06 | 1.6 ± 0.22 | 7.4 ± 0.03 | 7.4 ± 0.06 | 1.7 ± 0.26 | 8.9±0.22 | 7.0 ± 0.02 | 2.2 ± 0.23 | 8.1±0.03 | 7.4 ± 0.04 | 2.0 ± 0.45 | 8.1±0.03 | 7.0 ± 0.12 | 1.7 ± 0.26 | 16.8± 0.28 | 10.5 ± 0.23 | 1.5 ± 0.08 |
| Ultrasonic  power (W) | 200W | 8.1±0.10 | 6.8±0.05 | 2.4 ± 0.84 | 8.1 ± 0.17 | 7.2 ± 0.04 | 1.9 ± 0.10 | 7.4±0.10 | 7.0 ± 0.03 | 1.9 ± 0.31 | 8.0±0.17 | 7.1 ± 0.02 | 1.7 ± 0.21 | 7.2 ± 0.04 | 7.4 ± 0.07 | **1.7* ± 0.12** | 16.3 ± 0.01 | 9.1 ± 0.12 | 1.6 ± 0.08 |
| 250W | 8.4±0.07 | 6.9±0.07 | 1.7 ± 0.46 | 7.1 ± 0.02 | 7.0 ± 0.07 | 1.5 ± 0.06 | 7.2±0.02 | 7.1 ± 0.03 | 1.4 ± 0.25 | 8.8±0.21 | 7.6 ± 0.03 | 1.7 ± 0.32 | 7.7 ± 0.06 | 6.8 ± 0.00 | 1.4 ± 0.15 | 16.8 ± 0.28 | 10.4 ± 0.32 | 1.9 ± 0.06 |
| 300W | 7.3 ± 0.11 | 7.6 ± 0.05 | 1.9 ± 0.68 | 6.8 ± 0.07 | 7.9 ± 0.14 | 1.4 ± 0.38 | 7.2 ±0.05 | 6.9 ± 0.02 | 1.9 ± 0.10 | 7.4±0.02 | 6.8 ± 0.00 | 1.6 ± 0.12 | 7.6 ± 0.04 | 7.1 ± 0.06 | 1.1 ± 0.4 | 17.4 ± 0.40 | 9.6 ± 0.38 | 1.7 ± 0.08 |
| 350W | 6.7 ± 0.06 | 6.9 ± 0.00 | 2.0 ± 0.84 | 6.6 ± 0.04 | 8.5 ± 0.23 | 1.5 ± 0.62 | 7.6±0.15 | 7.2 ± 0.01 | 1.5 ± 0.55 | 8.4±0.06 | 6.7 ± 0.02 | 1.9 ± 0.10 | 8.0 ± 0.05 | **9.3*±0.24** | 1.3 ± 0.00 | 16.8 ± 0.31 | 9.9 ± 0.54 | 1.6 ± 0.08 |
| 400W | 7.3 ± 0.08 | 7.0 ± 0.05 | 3.0 ± 1.08 | 7.0 ± 0.14 | 6.6 ± 0.05 | 1.4 ± 0.72 | 7.2±0.11 | 7.5 ± 0.07 | 2.0 ± 0.36 | 7.5±0.10 | 7.6 ± 0.11 | 1.7 ± 0.12 | 7.4 ± 0.02 | 7.1 ± 0.03 | 2.0 ± 0.26 | 15.3 ± 0.31 | 10.2 ± 0.22 | 1.7 ± 0.08 |
| Ultrasonic  time | 15min | 7.3 ± 0.11 | 6.9 ± 0.07 | 2.1 ± 0.46 | 7.1 ± 0.02 | 7.0 ± 0.07 | 1.5 ± 0.06 | 7.2±0.02 | 7.1 ± 0.03 | 1.4 ± 0.25 | 7.2 ±0.21 | 7.6 ± 0.03 | 1.7 ± 0.32 | 7.7 ± 0.06 | 6.8 ± 0.00 | 1.4 ± 0.15 | 15.2 ± 0.03 | 8.6 ± 0.24 | 1.7 ± 0.08 |
| 30min | 6.5 ± 0.03 | 6.9 ± 0.06 | 2.5 ± 0.58 | 7.7 ± 0.05 | 8.2 ± 0.10 | 1.6 ± 0.32 | 6.3±0.02 | 8.7 ± 0.29 | 1.8 ± 0.15 | 7.3±0.12 | 6.9 ± 0.02 | 1.8 ± 0.06 | 6.6 ± 0.04 | 7.1 ± 0.01 | **1.9* ± 0.40** | 15.3 ± 0.30 | 9.7 ± 0.08 | 1.8 ± 0.09 |
| 45min | 7.9 ± 0.11 | 6.6 ± 0.05 | 2.1 ± 0.15 | 7.8 ± 0.10 | 7.3 ± 0.05 | 1.6 ± 0.06 | 7.1±0.11 | 7.6 ± 0.05 | 1.8 ± 0.12 | 7.9±0.13 | 7.1 ± 0.01 | 1.5 ± 0.26 | 7.0 ± 0.03 | 7.0 ± 0.01 | 1.9±0.31 | 16.3 ± 0.01 | 10.4 ± 0.13 | 1.8 ± 0.09 |
| 60min | 7.2 ± 0.06 | 6.8 ± 0.06 | 2.2 ± 0.80 | 7.1 ± 0.05 | 9.2 ± 0.24 | 1.8 ± 0.06 | 7.3±0.05 | 7.4 ± 0.01 | **1.9* ± 0.10** | 7.4±0.06 | 6. 9± 0.02 | 1.5 ± 0.26 | 7.0 ± 0.03 | 7.5 ± 0.06 | 1.8±0.35 | 15.9 ± 0.25 | 9.6 ± 0.36 | 1.7 ± 0.08 |
| 75min | 7.7 ± 0.11 | 8.1 ± 0.19 | 2.5 ± 0.55 | 8.7 ± 0.31 | 7.8 ± 0.06 | 1.8 ± 0.47 | 7.1 ±0.06 | 7.1 ± 0.03 | 1.8 ± 0.29 | 7.0±0.02 | 8.8 ± 0.34 | 1.9 ± 0.38 | 7.8 ± 0.11 | **8.8*±0.20** | 1.7±0.49 | 15.8 ± 0.30 | 10. 5± 0.13 | 1.7 ± 0.08 |

aValues are the means of 3 replicates± the standard deviation.

*Comparisons within a species of the minimal inhibitory values obtained at same experimental variables with different values that are significantly different to the same tested strains (P < 0.05). We chose the value of an experimental variable that gave the maximal mean zones of inhibition, significantly different from other values as the optimum value of experimental variable to every tested strains
